# Supplementary material for: High-efficiency and minimum-waste continuous kinetic resolution of racemic alcohols by using lipase in supercritical carbon dioxide
Source: Royal Society of Chemistry journal article supplement (doi:10.1039/b406882c), 2004-01-01
Supplement: b406882c.pdf [file b406882c.pdf]

**Supporting information**

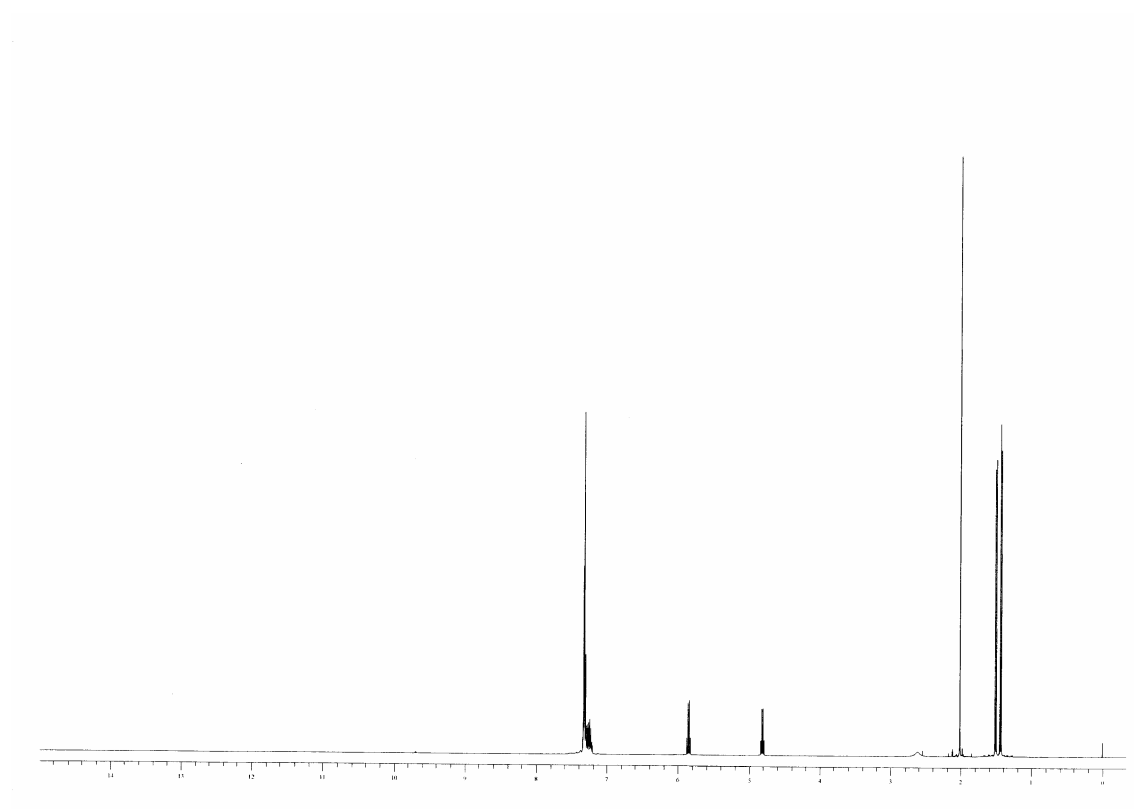

NMR spectrum of the product, (*S*)-1-phenylethanol and the corresponding (*R*)-acetate, without any purification procedure.

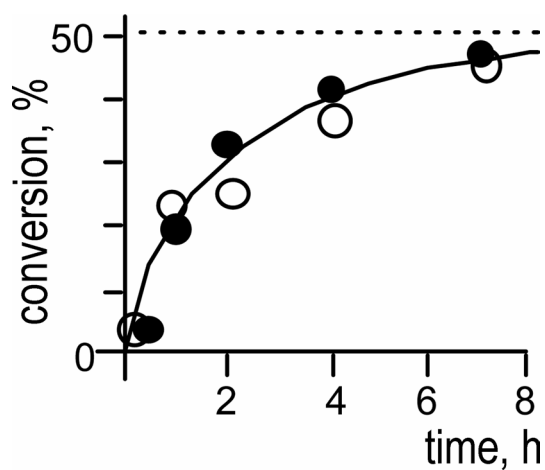

**Fig.** Kinetic resolution of (*R/S*)-1 by Novozym in scCO<sub>2</sub> using batch reactor.

Conditions: (*R/S*)-1: 0.10 mL, 2: 0.50 mL, Novozym: 5.0 mg, scCO<sub>2</sub>: 10 mL, 40 °C,  
x: 9 MPa, circle: 13 MPa

**Table.** Kinetic resolution of (*R/S*)-**1** by Novozym using scCO<sub>2</sub> flow reactor

| Run | Time/<br>h <sup>a</sup> | Sampling time/<br>min | Recovered,<br>g <sup>b</sup> | ( <i>S</i> )- <b>1</b> ,<br>% ee | ( <i>R</i> )- <b>3</b> ,<br>% ee | Conv.,<br>% <sup>c</sup> | <i>E</i> |
|-----|-------------------------|-----------------------|------------------------------|----------------------------------|----------------------------------|--------------------------|----------|
| 1   | 0.0                     | 57                    | 3.48                         | 85.9                             | 99.7                             | 46                       | 1900     |
| 2   | 1.0                     | 47                    | 2.87                         | 90.9                             | 99.7                             | 48                       | 1820     |
| 3   | 1.8                     | 36                    | 2.22                         | 92.0                             | 99.6                             | 48                       | 1840     |

Conditions: Novozym: 5.0 mL (1.89 g), scCO<sub>2</sub> flow: 1.5 mL/min, **1:2** = 1:0.5, flow rate of a mixture of **1** and **2**: 0.070 mL/min, 42 °C, 13.0 MPa. <sup>a</sup>Reaction time after reaching the steady reaction conditions. <sup>b</sup>Recovered products included unreacted (*S*)-**1** and the product ester (*R*)-**3**. <sup>c</sup> Conversion to **3** based on the starting amount of **1**.

*Experimental procedure:* The enzymatic continuous reactions were carried out isothermally in a continuous up-flow tubular reactor (1/2 inch x 10 mm x 135 mm).<sup>9</sup> CO<sub>2</sub> was sent to the reactor by a HPLC pump (JASCO, PU-1580) equipped with a cooler, and the substrate mixture was sent to the reactor by a HPLC pump (JASCO, PU-2080). The pressure was controlled by a back-pressure regulator (JASCO, SCF-Bpg) and measured at upstream and downstream of the reactor. The temperature was controlled by a thermal air oven and was measured at the top, bottom and outside of the reactor.
